# Supplementary material
Source: Springer Nature journal article supplement (https://www.springermedizin.de/resource/supplementary/12987_2009_428_MOESM3_ESM.pdf/9612018)

A

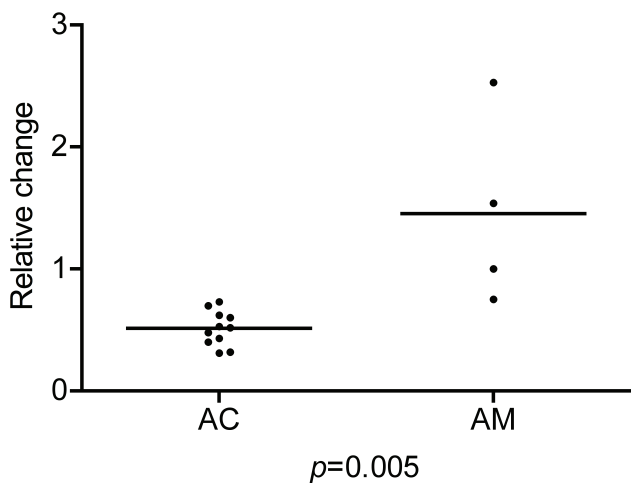

B

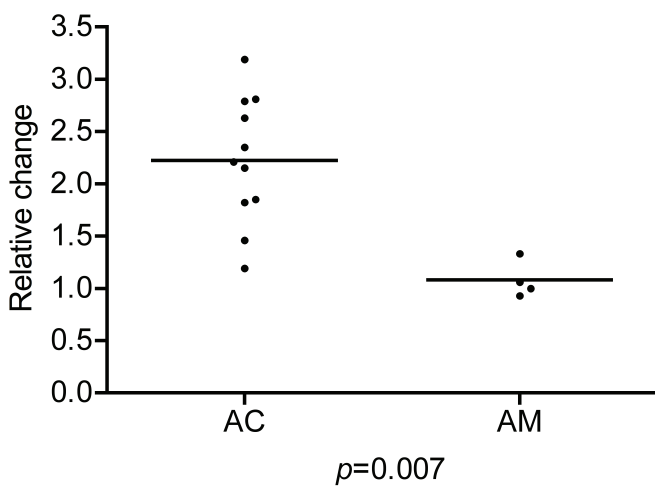

C

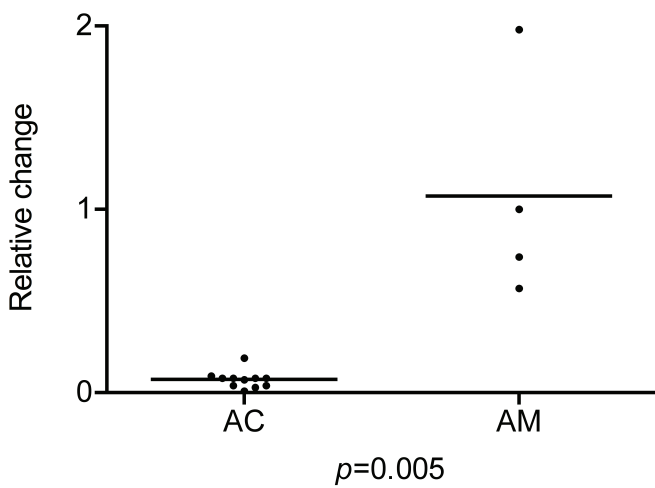

Supplement: MOESM3 [file 9612018]
